# Supplementary material for: Identification of 2C-B in Hair by UHPLC-HRMS/MS. A Real Forensic Case
Source: MDPI journal article supplement (doi:10.3390/toxics9070170), 2021-07-15
Supplement: s1 [file s1]

## Case Report

# Supplementary Materials: Identification of 2C-B in Hair by UHPLC-HRMS/MS. A Real Forensic Case

José Manuel Matey, Adrián López-Fernández, Carmen García-Ruiz, Gemma Montalvo, Félix Zapata and María A. Martínez

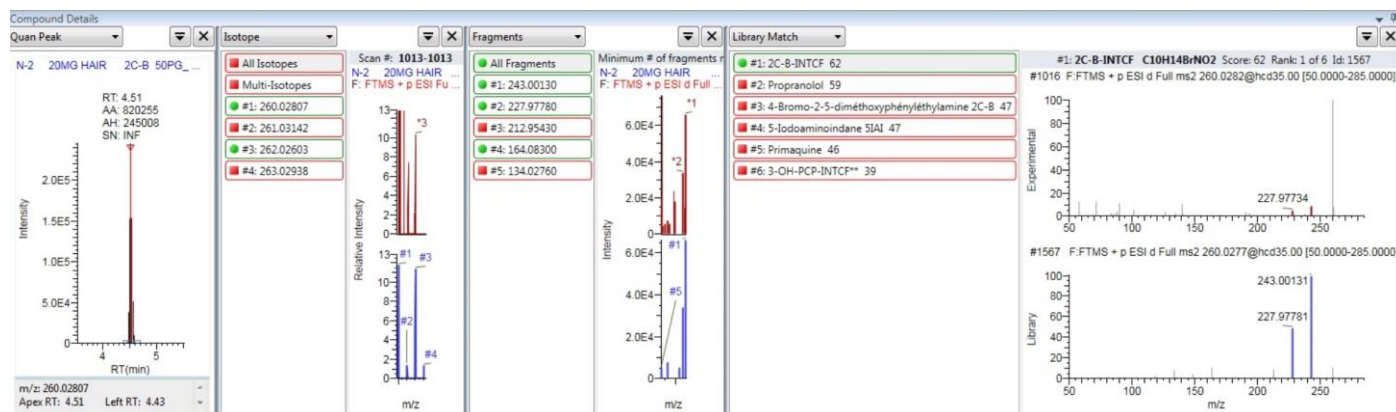

Figure S1. LOI 50pg/mg by 2C-B in Target Screening method.
